# Supplementary material for: The Molecular Architecture of the Nuclear Basket
Source: PubMed Central journal article supplement — bioRxiv. 2024 Mar 28:2024.03.27.587068. Preprint. [Version 1] doi: 10.1101/2024.03.27.587068 (PMC10996695; doi:10.1101/2024.03.27.587068), 2024-03-28
Supplement: NIHPP2024.03.27.587068v1-supplement-1.pdf [file NIHPP2024.03.27.587068v1-supplement-1.pdf]

**Supplementary Information Table 1. Information and spatial restraints for Integrative modeling of yeast and mouse basket.** For each basket model (column 1), a list of experimental techniques is shown in column 2 that provides the spatial information (column 3) for Integrative modeling. Column 4 provides a reference to the original dataset or method.

| Model       | Experimental Technique                                                              | Spatial Information                                                                                                                                                                               | Reference                |
|-------------|-------------------------------------------------------------------------------------|---------------------------------------------------------------------------------------------------------------------------------------------------------------------------------------------------|--------------------------|
| Yeast       | Quantitative mass spectrometry and biochemical quantification                       | Stoichiometry of Nups (SI Table 2)                                                                                                                                                                | (6)                      |
|             | Chemical cross-linking with mass spectrometry readout                               | 626 intra and inter-molecular crosslinks among yNups and yMlps                                                                                                                                    | (6, 24) & this study     |
|             | Cryo-ET                                                                             | The overall shape of the basket including the basket distal density                                                                                                                               | this study               |
|             | Integrative models and atomic structural models                                     | yNup84 complex dimer model yNup2 structural model (SI Table 2)                                                                                                                                    | (5, 110, 111)            |
|             | Bioinformatics information                                                          | Sequence information coiled-coil propensities of the yMlps alignments. Connectivity between residues.                                                                                             | (109)                    |
|             | Immuno-EM                                                                           | Upper and lower bound on the N-/C- terminus of yMlps                                                                                                                                              | (24)                     |
|             | Biochemical experiments including <i>in vitro</i> binding assays proximity labeling | Interactions between yNup60 <sup>MBM</sup> (240-318) and yMlp1 (382-620) Interaction between yNup60 <sup>N2BM</sup> (505-539) and yNup2 (83-136) nuclear envelope binding domain of yNup1, yNup60 | (26, 55)                 |
| Mouse/Human | Quantitative mass spectrometry and biochemical quantification                       | Stoichiometry of Nups (SI Table 3)                                                                                                                                                                | (112, 113)               |
|             | Cryo-ET                                                                             | The overall shape of the basket including the basket distal density                                                                                                                               | this study               |
|             | Integrative models and atomic structural models                                     | mNup107 complex dimer model mNup50 structural model (SI Table 3)                                                                                                                                  | (35, 103, 104, 110, 111) |
|             | Bioinformatics information                                                          | Sequence information coiled-coil propensities of the mTprs orthologs alignments. Connectivity between residues/beads. Structural equivalent distances between ortholog Nups.                      | (109)                    |
|             | Immuno-EM                                                                           | Upper and lower bound on the N-/C- terminus of mTprs                                                                                                                                              | (102)                    |
|             | Biochemical experiments including proximity labeling                                | Nuclear envelope binding domains of mNup153                                                                                                                                                       | (114)                    |

**Supplementary Information Table 2.** Summary of the Integrative modeling of the yBaskets

|                                                   |                                                                                                                                                                                                                                                                                                                                                                                                                                                                                                                                                                                                                                                                                                                                                                                                                                                                                                                                                                                                                                                                                                                                                                                                                                                                                                                                                                                                                                                              |
|---------------------------------------------------|--------------------------------------------------------------------------------------------------------------------------------------------------------------------------------------------------------------------------------------------------------------------------------------------------------------------------------------------------------------------------------------------------------------------------------------------------------------------------------------------------------------------------------------------------------------------------------------------------------------------------------------------------------------------------------------------------------------------------------------------------------------------------------------------------------------------------------------------------------------------------------------------------------------------------------------------------------------------------------------------------------------------------------------------------------------------------------------------------------------------------------------------------------------------------------------------------------------------------------------------------------------------------------------------------------------------------------------------------------------------------------------------------------------------------------------------------------------|
| <b>(1) Gathering data</b>                         |                                                                                                                                                                                                                                                                                                                                                                                                                                                                                                                                                                                                                                                                                                                                                                                                                                                                                                                                                                                                                                                                                                                                                                                                                                                                                                                                                                                                                                                              |
| Prior models                                      | yNup84 complex dimer (PDB id: 7n84) (5) Position of yNup84 complex derived by fitting on cryo-ET map using the chimera fit map feature (96, 115), yNup2 alphaFold model (AF-P32499-F1-model-v4.pdb) (110, 111, 116).                                                                                                                                                                                                                                                                                                                                                                                                                                                                                                                                                                                                                                                                                                                                                                                                                                                                                                                                                                                                                                                                                                                                                                                                                                         |
| Physical principles and statistical preferences   | Excluded volume. Sequence connectivity                                                                                                                                                                                                                                                                                                                                                                                                                                                                                                                                                                                                                                                                                                                                                                                                                                                                                                                                                                                                                                                                                                                                                                                                                                                                                                                                                                                                                       |
| Experimental information                          | See SI Table 1                                                                                                                                                                                                                                                                                                                                                                                                                                                                                                                                                                                                                                                                                                                                                                                                                                                                                                                                                                                                                                                                                                                                                                                                                                                                                                                                                                                                                                               |
| <b>(2) Representing the system</b>                |                                                                                                                                                                                                                                                                                                                                                                                                                                                                                                                                                                                                                                                                                                                                                                                                                                                                                                                                                                                                                                                                                                                                                                                                                                                                                                                                                                                                                                                              |
| Sequences (Uniprot Ids)                           | yMlp1:Q02455, yMlp2:P40457, yMlp:Poly-ala of length yMlp1, yNup1:P20676, yNup2:P32499, yNup60:P39705, yNup120:P35729, yNup85:P46673, yNup145c:P49687, ySec13:Q04491, ySeh1:P53011, yNup84:P52891, yNup133:P36161                                                                                                                                                                                                                                                                                                                                                                                                                                                                                                                                                                                                                                                                                                                                                                                                                                                                                                                                                                                                                                                                                                                                                                                                                                             |
| Composition (number of copies)                    | yMlp2, yNup1:1, yNup2:2, yNup60:2, yNup120:2, yNup85:3, yNup145c:2, ySec13:2, ySeh1:2, yNup84:2, yNup133:2                                                                                                                                                                                                                                                                                                                                                                                                                                                                                                                                                                                                                                                                                                                                                                                                                                                                                                                                                                                                                                                                                                                                                                                                                                                                                                                                                   |
| Atomic (structured) components                    | yMlp.0: 71-183, 197-221, 239-281, 285-324, 340-371, 435-463, 535-570, 575-617, 622-668, 689-717, 745-773, 791-840, 844-893, 930-986, 990-1088, 1092-1127, 1143-1199, 1212-1251, 1254-1286, 1290-1339, 1343-1385, 1408-1457, yMlp.1: 71-183, 197-221, 239-281, 285-324, 340-371, 435-463, 535-570, 575-617, 622-668, 689-717, 745-773, 791-840, 844-893, 930-986, 990-1088, 1092-1127, 1143-1199, 1212-1251, 1254-1286, 1290-1339, 1343-1385, 1408-1457, yNup1.0: 1-32, 85-104, 106-123, yNup2.0: 83-136, 602-720, yNup2.1: 83-136, 602-720, yNup60.0: 27-47, 91-104, 106-119, 121-140, 142-162, yNup60.1: 27-47, 91-104, 106-119, 121-140, 142-162, yNup120.0: 1-29, 53-305, 311-711, 714-1036, yNup120.1: 1-29, 53-305, 311-711, 714-1036, yNup133.0: 63-183, 198-480, 490-763, 772-1155, yNup133.1: 56-77, 86-125, 133-144, 162-184, 193-200, 206-249, 258-480, 490-763, 772-1155, yNup145c.0: 119-712, yNup145c.1: 119-712, yNup84.0: 7-20, 27-80, 96-126, 136-364, 372-483, 506-562, 575-726, yNup84.1: 7-20, 27-80, 96-126, 136-364, 372-483, 506-562, 575-726, yNup85.0: 47-126, 132-230, 235-436, 451-739, yNup85.1: 47-126, 132-230, 235-436, 451-739, yNup85.2: 47-126, 132-230, 235-436, 451-739, ySec13.0: 8-157, 170-293, ySec13.1: 8-157, 170-293, ySeh1.0: 1-248, 288-346, ySeh1.1: 1-248, 288-346                                                                                                                                             |
| Unstructured components                           | yMlp.0-NTD: 1-70, yMlp.1-NTD: 1-70, yMlp.0-LOOP: 184-196, 222-238, 282-284, 325-339, 372-434, 464-534, 571-574, 618-621, 669-688, 718-744, 774-790, 841-843, 894-929, 987-989, 1089-1091, 1128-1142, 1200-1211, 1252-1253, 1287-1289, 1340-1342, 1386-1407, yMlp.1-LOOP: 184-196, 222-238, 282-284, 325-339, 372-434, 464-534, 571-574, 618-621, 669-688, 718-744, 774-790, 841-843, 894-929, 987-989, 1089-1091, 1128-1142, 1200-1211, 1252-1253, 1287-1289, 1340-1342, 1386-1407, yMlp.0-CTD: 1458-1875, yMlp.1-CTD: 1458-1875, yNup1.0: 33-84, 105-105, 124-335, yNup2.0: 51-82, yNup2.1: 51-82, yNup60.0: 1-26, 48-90, 105-105, 120-120, 141-141, 163-398, 505-539, yNup60.1: 1-26, 48-90, 105-105, 120-120, 141-141, 163-398, 505-539, yNup120.0: 30-52, 306-310, 712-713, 1037-1037, yNup120.1: 30-52, 306-310, 712-713, 1037-1037, yNup133.0: 1-62, 184-197, 481-489, 764-771, 1156-1157, yNup133.1: 1-55, 78-85, 126-132, 145-161, 185-192, 201-205, 250-257, 481-489, 764-771, 1156-115, yNup145c.0: 1-118, yNup145c.1: 1-118, yNup84.0: 1-6, 21-26, 81-95, 127-135, 365-371, 484-505, 563-574, yNup84.1: 1-6, 21-26, 81-95, 127-135, 365-371, 484-505, 563-574, yNup85.0: 1-46, 127-131, 231-234, 437-450, 740-744, yNup85.1: 1-46, 127-131, 231-234, 437-450, 740-744, yNup85.2: 1-46, 127-131, 231-234, 437-450, 740-744, ySec13.0: 1-7, 158-169, 294-297, ySec13.1: 1-7, 158-169, 294-297, ySeh1.0: 249-287, 347-349, ySeh1.1: 249-287, 347-349 |
| Resolutions of structured components              | 1 [R1] residue per bead and 30 [R30] residue per bead                                                                                                                                                                                                                                                                                                                                                                                                                                                                                                                                                                                                                                                                                                                                                                                                                                                                                                                                                                                                                                                                                                                                                                                                                                                                                                                                                                                                        |
| Resolutions of unstructured components            | yMlp.0-NTD: 50 [R50] residue per bead, yMlp.1-NTD: 50 [R50] residue per bead, yMlp.0-LOOP: 5 [R5] residue per bead, yMlp.1-LOOP: 5 [R5] residue per bead, yMlp.0-CTD: 50 [R50] residue per bead, yMlp.1-CTD: 50 [R50] residue per bead, Rest all unstructured components 30 [R30] residue per bead                                                                                                                                                                                                                                                                                                                                                                                                                                                                                                                                                                                                                                                                                                                                                                                                                                                                                                                                                                                                                                                                                                                                                           |
| Structural coverage                               | 77.39%                                                                                                                                                                                                                                                                                                                                                                                                                                                                                                                                                                                                                                                                                                                                                                                                                                                                                                                                                                                                                                                                                                                                                                                                                                                                                                                                                                                                                                                       |
| Spatial restraints encoded into scoring functions | Excluded volume; applied to the R30 representation. Sequence connectivity; applied to the R1 representation. Cross-link restraints; applied to the R1 representation.                                                                                                                                                                                                                                                                                                                                                                                                                                                                                                                                                                                                                                                                                                                                                                                                                                                                                                                                                                                                                                                                                                                                                                                                                                                                                        |

**Supplementary Information Table 2.** Continued..

|                                                                                         |                                                                                                                                                                                                                                                                                                                                                                                                                                                                                                                                                                                                                                                                                                                                                                                                                                                                                                                                                                                                                                                                                                                                                                                                                                                                                                                                                                                                                                                                                                                                                                                                                                                                                                                                                                                                                                                                                                                                                                                                                                                                                                                                                                                                                                                                                                                                                                                                                                              |
|-----------------------------------------------------------------------------------------|----------------------------------------------------------------------------------------------------------------------------------------------------------------------------------------------------------------------------------------------------------------------------------------------------------------------------------------------------------------------------------------------------------------------------------------------------------------------------------------------------------------------------------------------------------------------------------------------------------------------------------------------------------------------------------------------------------------------------------------------------------------------------------------------------------------------------------------------------------------------------------------------------------------------------------------------------------------------------------------------------------------------------------------------------------------------------------------------------------------------------------------------------------------------------------------------------------------------------------------------------------------------------------------------------------------------------------------------------------------------------------------------------------------------------------------------------------------------------------------------------------------------------------------------------------------------------------------------------------------------------------------------------------------------------------------------------------------------------------------------------------------------------------------------------------------------------------------------------------------------------------------------------------------------------------------------------------------------------------------------------------------------------------------------------------------------------------------------------------------------------------------------------------------------------------------------------------------------------------------------------------------------------------------------------------------------------------------------------------------------------------------------------------------------------------------------|
| Rigid body (RB) definitions                                                             | RB1: yMlp.0 71-183, yMlp.1 71-183, RB2: yMlp.0 197-221, yMlp.1 197-221, RB3: yMlp.0 239-281, yMlp.1 239-281, RB4: yMlp.0 285-324, yMlp.1 285-324, RB5: yMlp.0 340-371, yMlp.1 340-371, RB6: yMlp.0 435-463, yMlp.1 435-463, RB7: yMlp.0 535-570, yMlp.1 535-570, RB8: yMlp.0 575-617, yMlp.1 575-617, RB9: yMlp.0 622-668, yMlp.1 622-668, RB10: yMlp.0 689-717, yMlp.1 689-717, RB11: yMlp.0 745-773, yMlp.1 745-773, RB12: yMlp.0 791-840, yMlp.1 791-840, RB13: yMlp.0 844-893, yMlp.1 844-893, RB14: yMlp.0 930-986, yMlp.1 930-986, RB15: yMlp.0 990-1088, yMlp.1 990-1088, RB16: yMlp.0 1092-1127, yMlp.1 1092-1127, RB17: yMlp.0 1143-1199, yMlp.1 1143-1199, RB18: yMlp.0 1212-1251, yMlp.1 1212-1251, RB19: yMlp.0 1254-1286, yMlp.1 1254-1286, RB20: yMlp.0 1290-1339, yMlp.1 1290-1339, RB21: yMlp.0 1343-1385, yMlp.1 1343-1385, RB22: yMlp.0 1408-1457, yMlp.1 1408-1457, RB23: yNup1.0 1-32, RB24: yNup1.0 85-104, RB25: yNup1.0 106-123, RB26: yNup2.0 83-136, RB27: yNup2.0 602-720, RB28: yNup2.1 83-136, RB29: yNup2.1 602-720, RB30: yNup60.0 27-47, RB31: yNup60.0 91-104, RB32: yNup60.0 106-119, RB33: yNup60.0 121-140, RB34: yNup60.0 142-162, RB35: yNup60.1 27-47, RB36: yNup60.1 91-104, RB37: yNup60.1 106-119, RB38: yNup60.1 121-140, RB39: yNup60.1 142-162, RB40: yNup120.0 1-29, yNup120.0 53-305, yNup120.0 311-711, yNup120.0 714-1036, RB41: yNup120.1 1-29, yNup120.1 53-305, yNup120.1 311-711, yNup120.1 714-1036, RB42: yNup85.0 47-126, yNup85.0 132-230, yNup85.0 235-436, yNup85.0 451-739, RB43: yNup85.1 47-126, yNup85.1 132-230, yNup85.1 235-436, yNup85.1 451-739, RB44: yNup85.2 47-126, yNup85.2 132-230, yNup85.2 235-436, yNup85.2 451-739, RB45: yNup145c.0 119-712, RB46: yNup145c.1 119-712, RB47: ySec13.0 8-157, ySec13.0 170-293, RB48: ySec13.1 8-157, ySec13.1 170-293, RB49: ySeh1.0 1-248, ySeh1.0 288-346, RB50: ySeh1.1 1-248, ySeh1.1 288-346, RB51: yNup84.0 7-20, yNup84.0 27-80, yNup84.0 96-126, yNup84.0 136-364, yNup84.0 372-483, yNup84.0 506-562, yNup84.0 575-726, RB52: yNup84.1 7-20, yNup84.1 27-80, yNup84.1 96-126, yNup84.1 136-364, yNup84.1 372-483, yNup84.1 506-562, yNup84.1 575-726, RB53: yNup133.0 63-183, yNup133.0 198-480, yNup133.0 490-763, yNup133.0 772-1155, RB54: yNup133.1 56-77, yNup133.1 86-125, yNup133.1 133-144, yNup133.1 162-184, yNup133.1 193-200, yNup133.1 206-249, yNup133.1 258-480, yNup133.1 490-763, yNup133.1 772-1155 |
| <b>(3) Structural sampling</b>                                                          |                                                                                                                                                                                                                                                                                                                                                                                                                                                                                                                                                                                                                                                                                                                                                                                                                                                                                                                                                                                                                                                                                                                                                                                                                                                                                                                                                                                                                                                                                                                                                                                                                                                                                                                                                                                                                                                                                                                                                                                                                                                                                                                                                                                                                                                                                                                                                                                                                                              |
| Sampling method                                                                         | Replica Exchange Gibbs sampling, based on Metropolis Monte Carlo (105, 106)                                                                                                                                                                                                                                                                                                                                                                                                                                                                                                                                                                                                                                                                                                                                                                                                                                                                                                                                                                                                                                                                                                                                                                                                                                                                                                                                                                                                                                                                                                                                                                                                                                                                                                                                                                                                                                                                                                                                                                                                                                                                                                                                                                                                                                                                                                                                                                  |
| Replica exchange temperature range                                                      | 1.0 - 4.0                                                                                                                                                                                                                                                                                                                                                                                                                                                                                                                                                                                                                                                                                                                                                                                                                                                                                                                                                                                                                                                                                                                                                                                                                                                                                                                                                                                                                                                                                                                                                                                                                                                                                                                                                                                                                                                                                                                                                                                                                                                                                                                                                                                                                                                                                                                                                                                                                                    |
| Number of replicas                                                                      | 4                                                                                                                                                                                                                                                                                                                                                                                                                                                                                                                                                                                                                                                                                                                                                                                                                                                                                                                                                                                                                                                                                                                                                                                                                                                                                                                                                                                                                                                                                                                                                                                                                                                                                                                                                                                                                                                                                                                                                                                                                                                                                                                                                                                                                                                                                                                                                                                                                                            |
| Number of Independent runs                                                              | 300                                                                                                                                                                                                                                                                                                                                                                                                                                                                                                                                                                                                                                                                                                                                                                                                                                                                                                                                                                                                                                                                                                                                                                                                                                                                                                                                                                                                                                                                                                                                                                                                                                                                                                                                                                                                                                                                                                                                                                                                                                                                                                                                                                                                                                                                                                                                                                                                                                          |
| Number of structures generated                                                          | 15,467,933                                                                                                                                                                                                                                                                                                                                                                                                                                                                                                                                                                                                                                                                                                                                                                                                                                                                                                                                                                                                                                                                                                                                                                                                                                                                                                                                                                                                                                                                                                                                                                                                                                                                                                                                                                                                                                                                                                                                                                                                                                                                                                                                                                                                                                                                                                                                                                                                                                   |
| Movers for flexible string of beads                                                     | Random translation up to 10 Å                                                                                                                                                                                                                                                                                                                                                                                                                                                                                                                                                                                                                                                                                                                                                                                                                                                                                                                                                                                                                                                                                                                                                                                                                                                                                                                                                                                                                                                                                                                                                                                                                                                                                                                                                                                                                                                                                                                                                                                                                                                                                                                                                                                                                                                                                                                                                                                                                |
| Total time for sampling                                                                 | 180 hours on 1200 processors                                                                                                                                                                                                                                                                                                                                                                                                                                                                                                                                                                                                                                                                                                                                                                                                                                                                                                                                                                                                                                                                                                                                                                                                                                                                                                                                                                                                                                                                                                                                                                                                                                                                                                                                                                                                                                                                                                                                                                                                                                                                                                                                                                                                                                                                                                                                                                                                                 |
| <b>(4) Validating the yBasket models</b>                                                |                                                                                                                                                                                                                                                                                                                                                                                                                                                                                                                                                                                                                                                                                                                                                                                                                                                                                                                                                                                                                                                                                                                                                                                                                                                                                                                                                                                                                                                                                                                                                                                                                                                                                                                                                                                                                                                                                                                                                                                                                                                                                                                                                                                                                                                                                                                                                                                                                                              |
| <b>Models selected for validation</b>                                                   |                                                                                                                                                                                                                                                                                                                                                                                                                                                                                                                                                                                                                                                                                                                                                                                                                                                                                                                                                                                                                                                                                                                                                                                                                                                                                                                                                                                                                                                                                                                                                                                                                                                                                                                                                                                                                                                                                                                                                                                                                                                                                                                                                                                                                                                                                                                                                                                                                                              |
| Equilibrated models                                                                     | 2,335,171                                                                                                                                                                                                                                                                                                                                                                                                                                                                                                                                                                                                                                                                                                                                                                                                                                                                                                                                                                                                                                                                                                                                                                                                                                                                                                                                                                                                                                                                                                                                                                                                                                                                                                                                                                                                                                                                                                                                                                                                                                                                                                                                                                                                                                                                                                                                                                                                                                    |
| Number of structures in samples A/B                                                     | All: 1,210,882 / 1,072,745                                                                                                                                                                                                                                                                                                                                                                                                                                                                                                                                                                                                                                                                                                                                                                                                                                                                                                                                                                                                                                                                                                                                                                                                                                                                                                                                                                                                                                                                                                                                                                                                                                                                                                                                                                                                                                                                                                                                                                                                                                                                                                                                                                                                                                                                                                                                                                                                                   |
| Number of structures selected for RMSD clustering sample A/B                            | Random sub-sample: 7,857 / 7,987                                                                                                                                                                                                                                                                                                                                                                                                                                                                                                                                                                                                                                                                                                                                                                                                                                                                                                                                                                                                                                                                                                                                                                                                                                                                                                                                                                                                                                                                                                                                                                                                                                                                                                                                                                                                                                                                                                                                                                                                                                                                                                                                                                                                                                                                                                                                                                                                             |
| p-value of non-parametric Kolmogorov-Smirnov two-sample test                            | 0.0556 (threshold p-value > 0.05)                                                                                                                                                                                                                                                                                                                                                                                                                                                                                                                                                                                                                                                                                                                                                                                                                                                                                                                                                                                                                                                                                                                                                                                                                                                                                                                                                                                                                                                                                                                                                                                                                                                                                                                                                                                                                                                                                                                                                                                                                                                                                                                                                                                                                                                                                                                                                                                                            |
| Kolmogorov-Smirnov two-sample test statistic, D                                         | 0.0                                                                                                                                                                                                                                                                                                                                                                                                                                                                                                                                                                                                                                                                                                                                                                                                                                                                                                                                                                                                                                                                                                                                                                                                                                                                                                                                                                                                                                                                                                                                                                                                                                                                                                                                                                                                                                                                                                                                                                                                                                                                                                                                                                                                                                                                                                                                                                                                                                          |
| <b>Thoroughness of the structural sampling</b>                                          |                                                                                                                                                                                                                                                                                                                                                                                                                                                                                                                                                                                                                                                                                                                                                                                                                                                                                                                                                                                                                                                                                                                                                                                                                                                                                                                                                                                                                                                                                                                                                                                                                                                                                                                                                                                                                                                                                                                                                                                                                                                                                                                                                                                                                                                                                                                                                                                                                                              |
| Sampling precision                                                                      | 70.41 Å                                                                                                                                                                                                                                                                                                                                                                                                                                                                                                                                                                                                                                                                                                                                                                                                                                                                                                                                                                                                                                                                                                                                                                                                                                                                                                                                                                                                                                                                                                                                                                                                                                                                                                                                                                                                                                                                                                                                                                                                                                                                                                                                                                                                                                                                                                                                                                                                                                      |
| Homogeneity of proportions chi-squared-test (p-value)/Cramers V value                   | 0.0/0.095 (thresholds: p-value<0.05 OR Cramer's V<0.1)                                                                                                                                                                                                                                                                                                                                                                                                                                                                                                                                                                                                                                                                                                                                                                                                                                                                                                                                                                                                                                                                                                                                                                                                                                                                                                                                                                                                                                                                                                                                                                                                                                                                                                                                                                                                                                                                                                                                                                                                                                                                                                                                                                                                                                                                                                                                                                                       |
| Number of clusters                                                                      | 5                                                                                                                                                                                                                                                                                                                                                                                                                                                                                                                                                                                                                                                                                                                                                                                                                                                                                                                                                                                                                                                                                                                                                                                                                                                                                                                                                                                                                                                                                                                                                                                                                                                                                                                                                                                                                                                                                                                                                                                                                                                                                                                                                                                                                                                                                                                                                                                                                                            |
| Cluster populations                                                                     | Cluster 1 : 93.5%, Cluster 2 : 4.0%, Cluster 3 : 1.2%, Cluster 4 : 1.0%, Cluster 5 : 0.3%                                                                                                                                                                                                                                                                                                                                                                                                                                                                                                                                                                                                                                                                                                                                                                                                                                                                                                                                                                                                                                                                                                                                                                                                                                                                                                                                                                                                                                                                                                                                                                                                                                                                                                                                                                                                                                                                                                                                                                                                                                                                                                                                                                                                                                                                                                                                                    |
| Cluster precisions                                                                      | Cluster 1 : 57.2 Å, Cluster 2 : 58.6 Å, Cluster 3 : 56.5 Å, Cluster 4 : 53.3 Å, Cluster 5 : 59.8 Å                                                                                                                                                                                                                                                                                                                                                                                                                                                                                                                                                                                                                                                                                                                                                                                                                                                                                                                                                                                                                                                                                                                                                                                                                                                                                                                                                                                                                                                                                                                                                                                                                                                                                                                                                                                                                                                                                                                                                                                                                                                                                                                                                                                                                                                                                                                                           |
| Average cross-correlation between localization probability densities of samples A and B | 0.96                                                                                                                                                                                                                                                                                                                                                                                                                                                                                                                                                                                                                                                                                                                                                                                                                                                                                                                                                                                                                                                                                                                                                                                                                                                                                                                                                                                                                                                                                                                                                                                                                                                                                                                                                                                                                                                                                                                                                                                                                                                                                                                                                                                                                                                                                                                                                                                                                                         |
| <b>Validation by information used for modeling</b>                                      |                                                                                                                                                                                                                                                                                                                                                                                                                                                                                                                                                                                                                                                                                                                                                                                                                                                                                                                                                                                                                                                                                                                                                                                                                                                                                                                                                                                                                                                                                                                                                                                                                                                                                                                                                                                                                                                                                                                                                                                                                                                                                                                                                                                                                                                                                                                                                                                                                                              |
| Percent of sequence connectivity restraints satisfied by ensemble                       | 99%                                                                                                                                                                                                                                                                                                                                                                                                                                                                                                                                                                                                                                                                                                                                                                                                                                                                                                                                                                                                                                                                                                                                                                                                                                                                                                                                                                                                                                                                                                                                                                                                                                                                                                                                                                                                                                                                                                                                                                                                                                                                                                                                                                                                                                                                                                                                                                                                                                          |
| Percent Excluded volume restraint satisfied by ensemble                                 | Mean value 99.2% at R[30] resolution and mean value 99.9% at R[1] resolution                                                                                                                                                                                                                                                                                                                                                                                                                                                                                                                                                                                                                                                                                                                                                                                                                                                                                                                                                                                                                                                                                                                                                                                                                                                                                                                                                                                                                                                                                                                                                                                                                                                                                                                                                                                                                                                                                                                                                                                                                                                                                                                                                                                                                                                                                                                                                                 |
| Cross-correlation between localization probability densities and cryo-ET map            | 0.82                                                                                                                                                                                                                                                                                                                                                                                                                                                                                                                                                                                                                                                                                                                                                                                                                                                                                                                                                                                                                                                                                                                                                                                                                                                                                                                                                                                                                                                                                                                                                                                                                                                                                                                                                                                                                                                                                                                                                                                                                                                                                                                                                                                                                                                                                                                                                                                                                                         |
| Percent crosslink restraint satisfied by ensemble                                       | 94%                                                                                                                                                                                                                                                                                                                                                                                                                                                                                                                                                                                                                                                                                                                                                                                                                                                                                                                                                                                                                                                                                                                                                                                                                                                                                                                                                                                                                                                                                                                                                                                                                                                                                                                                                                                                                                                                                                                                                                                                                                                                                                                                                                                                                                                                                                                                                                                                                                          |
| <b>(5) Software and data availability</b>                                               |                                                                                                                                                                                                                                                                                                                                                                                                                                                                                                                                                                                                                                                                                                                                                                                                                                                                                                                                                                                                                                                                                                                                                                                                                                                                                                                                                                                                                                                                                                                                                                                                                                                                                                                                                                                                                                                                                                                                                                                                                                                                                                                                                                                                                                                                                                                                                                                                                                              |
| <b>Software</b>                                                                         |                                                                                                                                                                                                                                                                                                                                                                                                                                                                                                                                                                                                                                                                                                                                                                                                                                                                                                                                                                                                                                                                                                                                                                                                                                                                                                                                                                                                                                                                                                                                                                                                                                                                                                                                                                                                                                                                                                                                                                                                                                                                                                                                                                                                                                                                                                                                                                                                                                              |
| Modeling programs                                                                       | IMP PMI module, version-a41075a Integrative Modeling Platform (IMP), version 2.19 ( <a href="https://integrativemodeling.org">https://integrativemodeling.org</a> ) (52), Gmconv (117).                                                                                                                                                                                                                                                                                                                                                                                                                                                                                                                                                                                                                                                                                                                                                                                                                                                                                                                                                                                                                                                                                                                                                                                                                                                                                                                                                                                                                                                                                                                                                                                                                                                                                                                                                                                                                                                                                                                                                                                                                                                                                                                                                                                                                                                      |
| Modeling scripts                                                                        | <a href="https://github.com/neeleshsoni21/Yeast_NPC_Basket">https://github.com/neeleshsoni21/Yeast_NPC_Basket</a>                                                                                                                                                                                                                                                                                                                                                                                                                                                                                                                                                                                                                                                                                                                                                                                                                                                                                                                                                                                                                                                                                                                                                                                                                                                                                                                                                                                                                                                                                                                                                                                                                                                                                                                                                                                                                                                                                                                                                                                                                                                                                                                                                                                                                                                                                                                            |
| Structure prediction                                                                    | AlphaFold2                                                                                                                                                                                                                                                                                                                                                                                                                                                                                                                                                                                                                                                                                                                                                                                                                                                                                                                                                                                                                                                                                                                                                                                                                                                                                                                                                                                                                                                                                                                                                                                                                                                                                                                                                                                                                                                                                                                                                                                                                                                                                                                                                                                                                                                                                                                                                                                                                                   |
| Visualization and plotting                                                              | UCSF ChimeraX                                                                                                                                                                                                                                                                                                                                                                                                                                                                                                                                                                                                                                                                                                                                                                                                                                                                                                                                                                                                                                                                                                                                                                                                                                                                                                                                                                                                                                                                                                                                                                                                                                                                                                                                                                                                                                                                                                                                                                                                                                                                                                                                                                                                                                                                                                                                                                                                                                |

**Supplementary Information Table 3.** Summary of the Integrative modeling of the mBaskets.

|                                                   |                                                                                                                                                                                                                                                                                                                                                                                                                                                                                                                                                                                                                                                                                                                                                                                                                                                                                                                                                                                                                                                                                                                                                                                                                                                                                                                                                                                                                                                                                                                                                                                                                            |
|---------------------------------------------------|----------------------------------------------------------------------------------------------------------------------------------------------------------------------------------------------------------------------------------------------------------------------------------------------------------------------------------------------------------------------------------------------------------------------------------------------------------------------------------------------------------------------------------------------------------------------------------------------------------------------------------------------------------------------------------------------------------------------------------------------------------------------------------------------------------------------------------------------------------------------------------------------------------------------------------------------------------------------------------------------------------------------------------------------------------------------------------------------------------------------------------------------------------------------------------------------------------------------------------------------------------------------------------------------------------------------------------------------------------------------------------------------------------------------------------------------------------------------------------------------------------------------------------------------------------------------------------------------------------------------------|
| <b>(1) Gathering data</b>                         |                                                                                                                                                                                                                                                                                                                                                                                                                                                                                                                                                                                                                                                                                                                                                                                                                                                                                                                                                                                                                                                                                                                                                                                                                                                                                                                                                                                                                                                                                                                                                                                                                            |
| Prior models                                      | mNup107 complex dimer comparative model built on Human Nup107 complex (PDB id: 7r5j) (35, 103, 104). Position of yNup107 complex derived by fitting on cryo-ET map using the chimera fit map feature (96, 115), yNup50 alphaFold model (AF-Q9JH2-F1-model_v4.pdb) (110, 111, 116)                                                                                                                                                                                                                                                                                                                                                                                                                                                                                                                                                                                                                                                                                                                                                                                                                                                                                                                                                                                                                                                                                                                                                                                                                                                                                                                                          |
| Physical principles and statistical preferences   | Excluded volume. Sequence connectivity                                                                                                                                                                                                                                                                                                                                                                                                                                                                                                                                                                                                                                                                                                                                                                                                                                                                                                                                                                                                                                                                                                                                                                                                                                                                                                                                                                                                                                                                                                                                                                                     |
| Experimental information                          | See SI Table 1                                                                                                                                                                                                                                                                                                                                                                                                                                                                                                                                                                                                                                                                                                                                                                                                                                                                                                                                                                                                                                                                                                                                                                                                                                                                                                                                                                                                                                                                                                                                                                                                             |
| <b>(2) Representing the system</b>                |                                                                                                                                                                                                                                                                                                                                                                                                                                                                                                                                                                                                                                                                                                                                                                                                                                                                                                                                                                                                                                                                                                                                                                                                                                                                                                                                                                                                                                                                                                                                                                                                                            |
| Sequences (Uniprot Ids)                           | mTpr:F6ZDS4, mNup50:Q9JH2, mNup153:E9Q3G8, mNup43:P59235, mSeh1:Q8R2U0, mNup98-mNup96:Q6PFD9, mNup85:Q8R480, mNup37:Q9CWU9, mNup107:Q8BH74, mSec13:Q9D1M0, mNup133:Q8R0G9, mNup160:Q9Z0W3                                                                                                                                                                                                                                                                                                                                                                                                                                                                                                                                                                                                                                                                                                                                                                                                                                                                                                                                                                                                                                                                                                                                                                                                                                                                                                                                                                                                                                  |
| Composition (number of copies)                    | mTpr: 2, mNup50: 2, mNup153: 2, mNup107: 2, mNup133: 2, mNup160: 2, mNup37: 2, mNup43: 2, mNup85: 2, mNup96: 2, mSec13: 2, mSeh1: 2                                                                                                                                                                                                                                                                                                                                                                                                                                                                                                                                                                                                                                                                                                                                                                                                                                                                                                                                                                                                                                                                                                                                                                                                                                                                                                                                                                                                                                                                                        |
| Atomic (structured) components                    | mTpr.0: 96-120, 124-180, 187-247, 254-285, 289-356, 360-405, 413-451, 511-595, 639-681, 757-883, 901-946, 947-999, 1004-1060, 1064-1106, 1107-1131, 1135-1163, 1170-1201, 1205-1254, 1281-1337, 1343-1420, 1424-1491, 1543-1616, 1627-1690, mTpr.1: 96-120, 124-180, 187-247, 254-285, 289-356, 360-405, 413-451, 511-595, 639-681, 757-883, 901-946, 947-999, 1004-1060, 1064-1106, 1107-1131, 1135-1163, 1170-1201, 1205-1254, 1281-1337, 1343-1420, 1424-1491, 1543-1616, 1627-1690, mNup50.0: 151-204, 355-466, mNup50.1: 151-204, 355-466, mNup153.0: 36-57, mNup153.1: 36-57, mNup107.0: 145-926, mNup107.1: 145-926, mNup133.0: 70-1155, mNup133.1: 70-1155, mNup160.0: 1-1402, mNup160.1: 1-1402, mNup37.0: 1-326, mNup37.1: 1-326, mNup43.0: 1-292, 327-380, mNup43.1: 1-292, 327-380, mNup85.0: 1-656, mNup85.1: 1-656, mNup96.0: 1111-1159, 1194-1816, mNup96.1: 1111-1159, 1194-1816, mSec13.0: 1-302, mSec13.1: 1-302, mSeh1.0: 1-324, mSeh1.1: 1-324                                                                                                                                                                                                                                                                                                                                                                                                                                                                                                                                                                                                                                                         |
| Unstructured components                           | mTpr.0-NTD: 1-95, mTpr.1-NTD: 1-95, mTpr.0-LOOP: 121-123, 181-186, 248-253, 286-288, 357-359, 406-412, 452-510, 596-638, 682-756, 884-900, 1000-1003, 1061-1063, 1132-1134, 1164-1169, 1202-1204, 1255-1280, 1338-1342, 1421-1423, 1492-1542, 1617-1626, mTpr.1-LOOP: 1-95, 121-123, 181-186, 248-253, 286-288, 357-359, 406-412, 452-510, 596-638, 682-756, 884-900, 1000-1003, 1061-1063, 1132-1134, 1164-1169, 1202-1204, 1255-1280, 1338-1342, 1421-1423, 1492-1542, 1617-1626, mTpr.0-CTD: 1691-2431, mTpr.1-CTD: 1691-2431, mNup50.0: 1-150, 205-354, mNup50.1: 1-150, 205-354, mNup153.0: 1-35, 58-428, 540-574, mNup153.1: 1-35, 58-428, 540-574                                                                                                                                                                                                                                                                                                                                                                                                                                                                                                                                                                                                                                                                                                                                                                                                                                                                                                                                                                   |
| Resolutions of structured components              | 1 [R1] residue per bead and 30 [R30] residue per bead                                                                                                                                                                                                                                                                                                                                                                                                                                                                                                                                                                                                                                                                                                                                                                                                                                                                                                                                                                                                                                                                                                                                                                                                                                                                                                                                                                                                                                                                                                                                                                      |
| Resolutions of unstructured components            | mTpr.0-NTD: 50 [R50] residue per bead. mTpr.1-NTD: 50 [R50] residue per bead. mTpr.0-LOOP: 30 [R5] residue per bead. mTpr.1-LOOP: 30 [R5] residue per bead. mTpr.0-CTD: 50 [R50] residue per bead. mTpr.1-CTD: 50 [R50] residue per bead. Rest all unstructured components 30 [R30] residue per bead.                                                                                                                                                                                                                                                                                                                                                                                                                                                                                                                                                                                                                                                                                                                                                                                                                                                                                                                                                                                                                                                                                                                                                                                                                                                                                                                      |
| Structural coverage                               | 79.48%                                                                                                                                                                                                                                                                                                                                                                                                                                                                                                                                                                                                                                                                                                                                                                                                                                                                                                                                                                                                                                                                                                                                                                                                                                                                                                                                                                                                                                                                                                                                                                                                                     |
| Rigid body (RB) definitions                       | RB1: mTpr.0 96-120, mTpr.1 96-120, RB2: mTpr.0 124-180, mTpr.1 124-180, RB3: mTpr.0 187-247, mTpr.1 187-247, RB4: mTpr.0 254-285, mTpr.1 254-285, RB5: mTpr.0 289-356, mTpr.1 289-356, RB6: mTpr.0 360-405, mTpr.1 360-405, RB7: mTpr.0 413-451, mTpr.1 413-451, RB8: mTpr.0 511-595, mTpr.1 511-595, RB9: mTpr.0 639-681, mTpr.1 639-681, RB10: mTpr.0 757-883, mTpr.1 757-883, RB11: mTpr.0 901-946, mTpr.1 901-946, RB12: mTpr.0 947-999, mTpr.1 947-999, RB13: mTpr.0 1004-1060, mTpr.1 1004-1060, RB14: mTpr.0 1064-1106, mTpr.1 1064-1106, RB15: mTpr.0 1107-1131, mTpr.1 1107-1131, RB16: mTpr.0 1135-1163, mTpr.1 1135-1163, RB17: mTpr.0 1170-1201, mTpr.1 1170-1201, RB18: mTpr.0 1205-1254, mTpr.1 1205-1254, RB19: mTpr.0 1281-1337, mTpr.1 1281-1337, RB20: mTpr.0 1343-1420, mTpr.1 1343-1420, RB21: mTpr.0 1424-1491, mTpr.1 1424-1491, RB22: mTpr.0 1543-1616, mTpr.1 1543-1616, RB23: mTpr.0 1627-1690, mTpr.1 1627-1690, RB24: mNup50.0 151-204, RB25: mNup50.0 355-466, RB26: mNup50.1 151-204, RB27: mNup50.1 355-466, RB28: mNup153.0 36-57, RB29: mNup153.1 36-57. Fixed RB components: RB30: mNup160.0 1-1402, RB31: mNup160.1 1-1402, RB32: mNup85.0 1-656, RB33: mNup85.1 1-656, RB34: mNup96.0 1111-1159, mNup96.1 1194-1816, RB35: mNup96.1 1111-1159, mNup96.1 1194-1816, RB36: mSec13.0 1-302, RB37: mSec13.1 1-302, RB38: mSeh1.0 1-324, RB39: mSeh1.1 1-324, RB40: mNup107.0 145-926, RB41: mNup107.1 145-926, RB42: mNup133.0 70-1155, RB43: mNup133.1 70-1155, RB44: mNup37.0 1-326, RB45: mNup37.1 1-326, RB46: mNup43.0 1-292, mNup43.0 327-380, RB47: mNup43.1 1-292, mNup43.1 327-380 |
| Spatial restraints encoded into scoring functions | Excluded volume; applied to the R30 representation. Sequence connectivity; applied to the R1 representation. Cross-link restraints; applied to the R1 representation.                                                                                                                                                                                                                                                                                                                                                                                                                                                                                                                                                                                                                                                                                                                                                                                                                                                                                                                                                                                                                                                                                                                                                                                                                                                                                                                                                                                                                                                      |

**Supplementary Information Table 3.** Continued..

|                                                                                         |                                                                                                                                                                                              |
|-----------------------------------------------------------------------------------------|----------------------------------------------------------------------------------------------------------------------------------------------------------------------------------------------|
| <b>(3) Structural sampling</b>                                                          |                                                                                                                                                                                              |
| Sampling method                                                                         | Replica Exchange Gibbs sampling, based on Metropolis Monte Carlo (105, 106)                                                                                                                  |
| Replica exchange temperature range                                                      | 1.0 - 4.0                                                                                                                                                                                    |
| Number of replicas                                                                      | 2                                                                                                                                                                                            |
| Number of Independent runs                                                              | 200                                                                                                                                                                                          |
| Number of structures generated                                                          | 9,569,309                                                                                                                                                                                    |
| Movers for flexible string of beads                                                     | Random translation up to 10 Å                                                                                                                                                                |
| Total time for sampling                                                                 | 168 hours on 400 processors                                                                                                                                                                  |
| <b>(4) Validating the mBasket models</b>                                                |                                                                                                                                                                                              |
| <b>Models selected for validation</b>                                                   |                                                                                                                                                                                              |
| Equilibrated models                                                                     | 1,216,228                                                                                                                                                                                    |
| Number of structures in samples A/B                                                     | All: 520,767 / 474,386                                                                                                                                                                       |
| Number of structures selected for RMSD clustering sample A/B                            | Random sub-sample: 6,886 / 7,783                                                                                                                                                             |
| p-value of non-parametric Kolmogorov-Smirnov two-sample test                            | 0.056 (threshold p-value > 0.05)                                                                                                                                                             |
| Kolmogorov-Smirnov two-sample test statistic, D                                         | 0.0                                                                                                                                                                                          |
| <b>Throughness of the structural sampling</b>                                           |                                                                                                                                                                                              |
| Sampling precision                                                                      | 52.9 Å                                                                                                                                                                                       |
| Homogeneity of proportions chi-squared-test (p-value)/Cramers V value                   | 0.0/0.097 (thresholds: p-value<0.05 OR Cramer's V<0.1)                                                                                                                                       |
| Number of clusters                                                                      | 4                                                                                                                                                                                            |
| Cluster populations                                                                     | Cluster 1 : 75.6%, Cluster 2 : 15.6%, Cluster 3 : 8.1%, Cluster 4 : 0.7%                                                                                                                     |
| Cluster precisions                                                                      | Cluster 1 : 41.9 Å, Cluster 2 : 34.9 Å, Cluster 3 : 41.2 Å, Cluster 4 : 31.4 Å                                                                                                               |
| Average cross-correlation between localization probability densities of samples A and B | 0.95                                                                                                                                                                                         |
| <b>Validation by information used for modeling</b>                                      |                                                                                                                                                                                              |
| Percent of sequence connectivity restraints satisfied by ensemble                       | 99%                                                                                                                                                                                          |
| Percent Excluded volume restraint satisfied by ensemble                                 | Mean value 94.55% at R[30] resolution and mean value 99.63% at R[1] resolution                                                                                                               |
| Cross-correlation between localization probability densities and cryo-ET map            | 0.87                                                                                                                                                                                         |
| <b>(5) Software and data availability</b>                                               |                                                                                                                                                                                              |
| <b>Software</b>                                                                         |                                                                                                                                                                                              |
| Modeling programs                                                                       | IMP PMI module, version-a41075a Integrative Modeling Platform (IMP), version 2.19 ( <a href="https://integrativemodelling.org">https://integrativemodelling.org</a> ) (52). Gmconvert (117). |
| Modeling scripts                                                                        | <a href="https://github.com/neeleshsoni21/Mouse_NPC_Basket">https://github.com/neeleshsoni21/Mouse_NPC_Basket</a>                                                                            |
| Structure prediction                                                                    | AlphaFold2                                                                                                                                                                                   |
| Visualization and plotting                                                              | UCSF ChimeraX                                                                                                                                                                                |

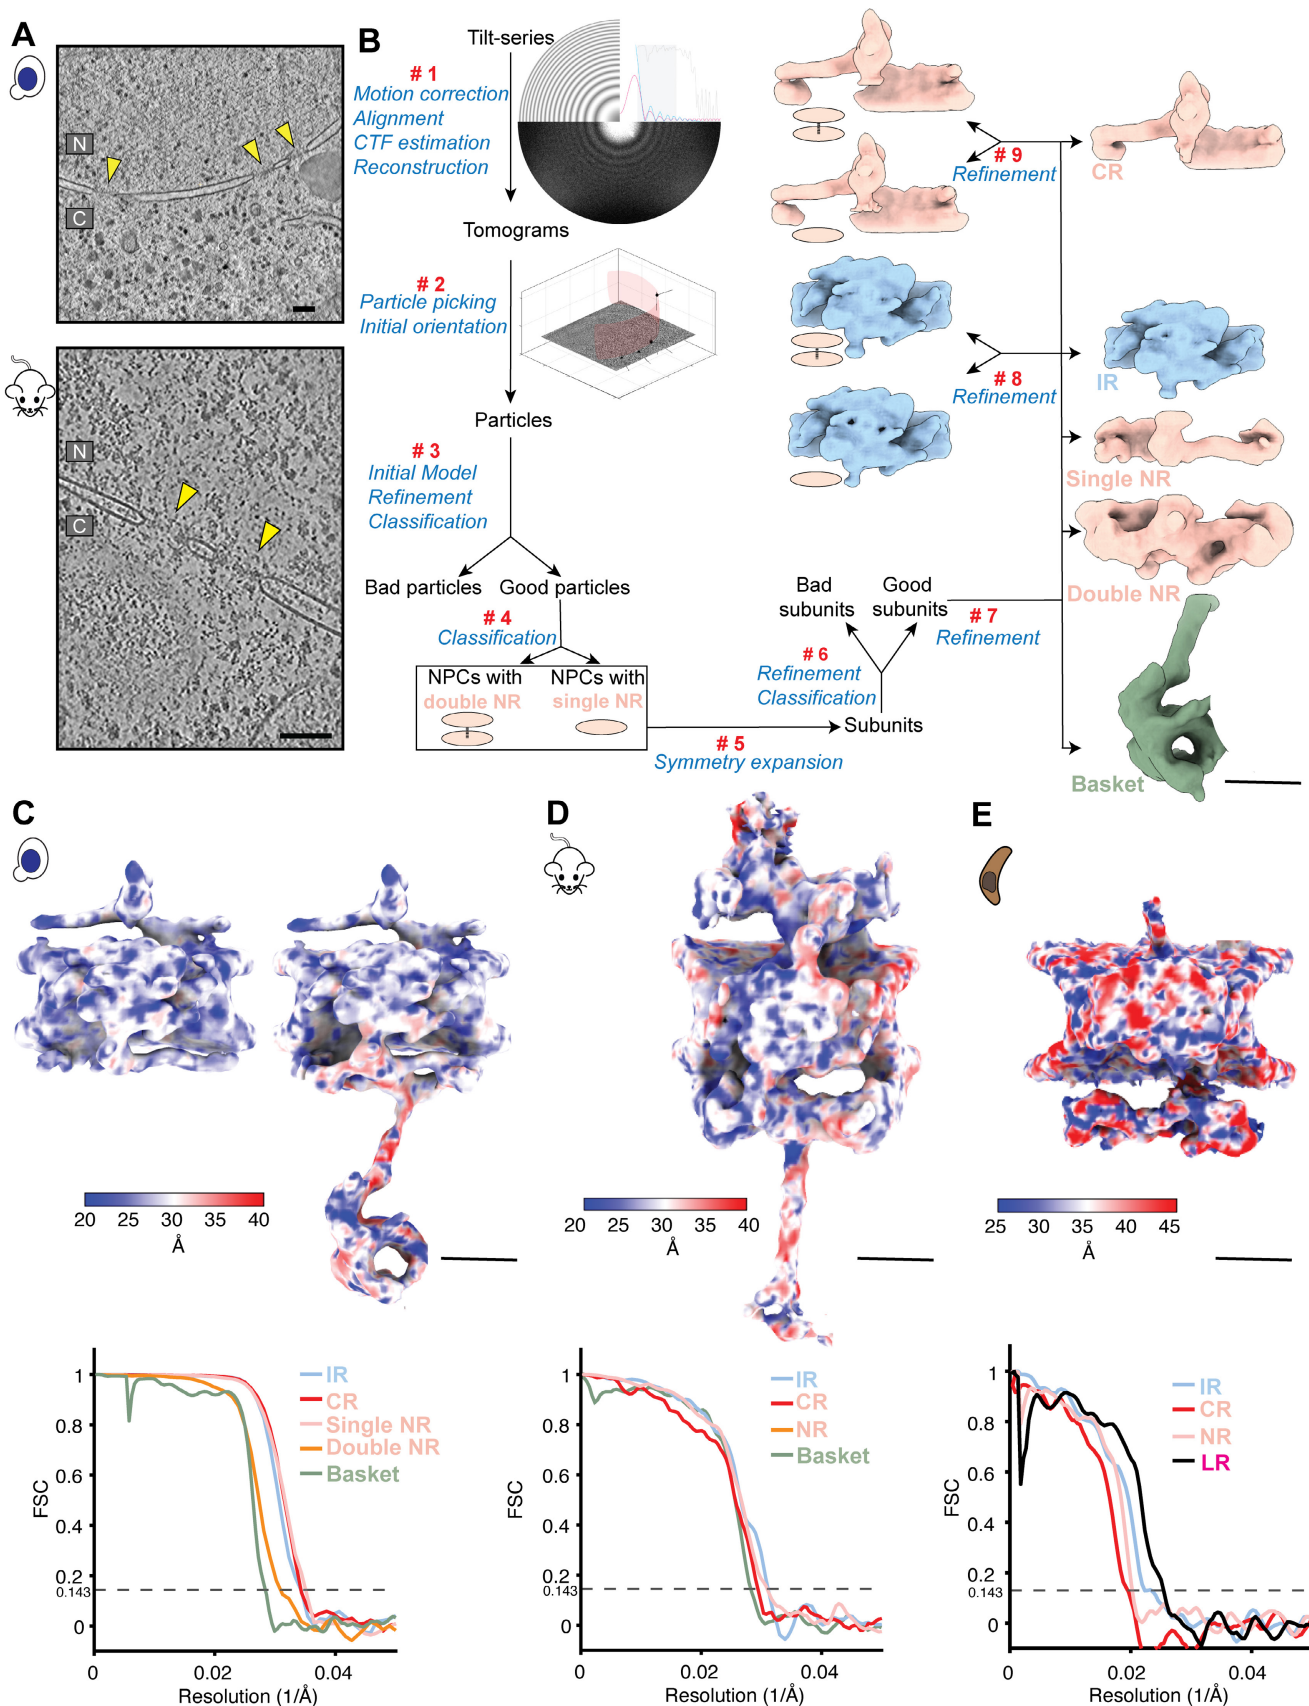

**Fig. S1. Workflow of the subtomogram analysis of the NPC.** (A) Slices of representative tomograms from yeast and mammalian cells, where nuclear pores are indicated by yellow arrows in the nucleus. Scale bar: 100 nm. (B) Processing workflow of the subtomogram analysis of the NPC, where steps are also indicated in red. The workflow is similar for data from all organisms. Some steps, like #4 for classifying out yNPCs with single and double NR, are more specific for yeast. For yeast, maps of the subunit of IR and CR from NPCs with single and double NR, as shown, resulting from steps 8 and 9 are similar. The same workflow was used for mNPC and pNPC. Scale bar: 200 Å. (C-E) Local resolution maps of the subunit of the NPC (top) along with Fourier shell correlation (FSC) curves of subunits of different rings (bottom) for yeast (C), mammalian (D), and *T. gondii*. (E). Scale bar: 200 Å. CR: Cytoplasmic ring, IR: Inner ring, NR: Nuclear ring, NE: Nuclear envelope, LR: Luminal ring.

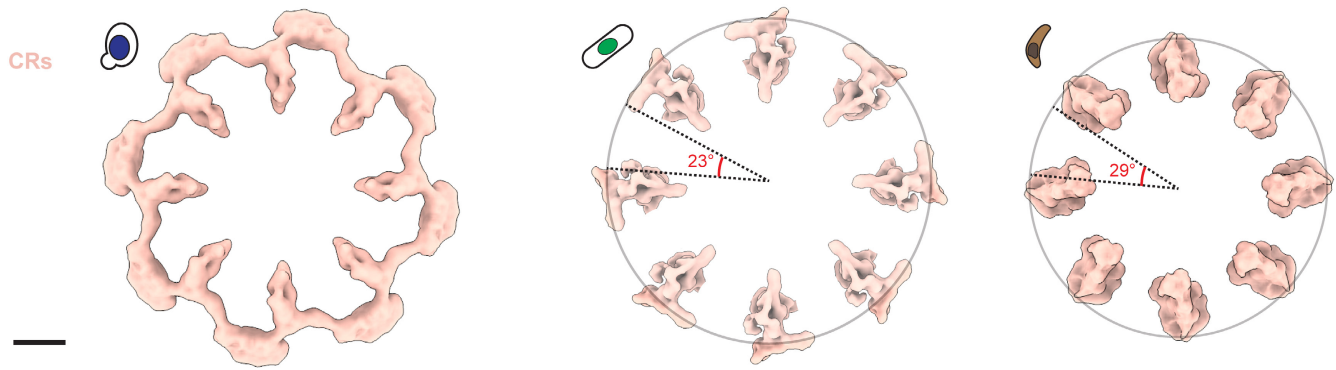

**Fig. S2. CRs of NPCs from different organisms can have differing extents of completeness.** (A) The circumference not covered (in central angles), by CRs of *S. cerevisiae* (left), *S. pombe* (middle; EMD: 11373 (46)) and *T. gondii* (right) is  $0^\circ$  ( $100-0\%= 100\%$  covered),  $23^\circ \times 8$  ( $100-51\% = 49\%$  covered),  $29^\circ \times 8$  ( $100-64\% = 36\%$  covered), respectively.

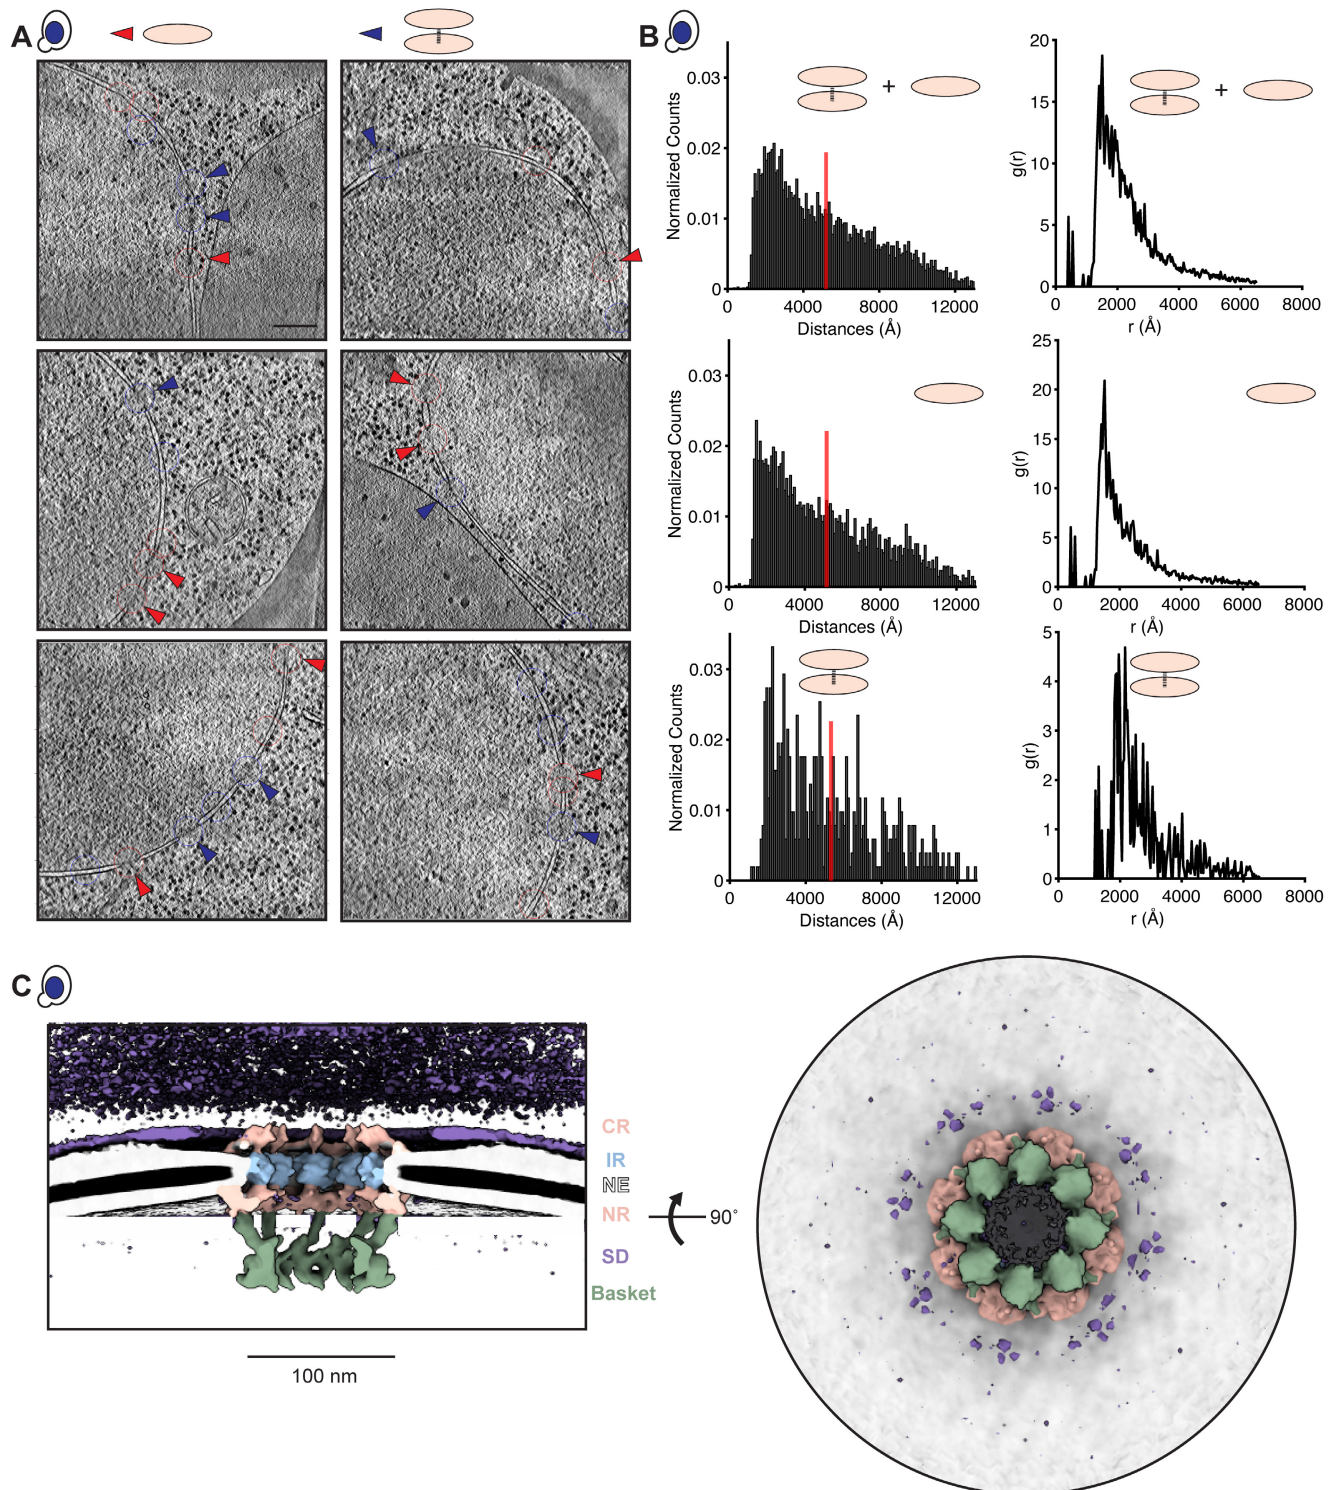

**Fig. S3. yNPCs have less pronounced nuclear surrounding densities and their single and double NR variants are similarly distributed across the nucleus. (A)** Slices of representative tomograms from yeast cells highlight yNPCs with single (indicated by red arrows) and double NRs (blue arrows). These images demonstrate that yNPCs with single and double NRs with a stable basket can be adjacent, rather than in distinctly separate areas. Scale bar: 100 nm. **(B)** Analysis of the yNPC's pairwise distance distribution (left) and the radial distribution function  $[g(r)]$  (right), encompassing all NPCs, as well as subsets with either single or double NRs, reveals a similar spatial distribution across the nucleus for all yNPCs. This is evidenced by the qualitative similarity in these distributions. **(C)** The cross-sectional (left) and nucleoplasmic view (right) of the map of yNPC shows the extent of crowding around the yNPC, with the surrounding densities (SD) shown at a very low isosurface threshold. These densities, compared to their counterpart in mNPCs, are much weaker.

### A Mlp-Tpr alignment

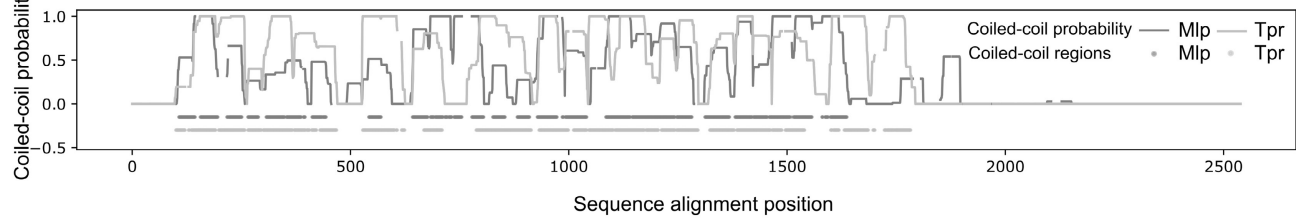

### B Mlp or Tpr dimer representation

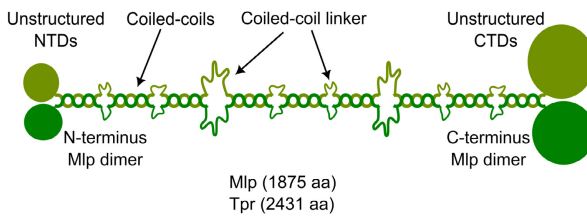

### C Basket anchor representation

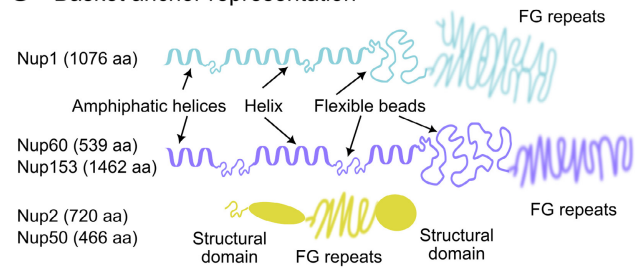

**Fig. S4. Nuclear basket model representation.** (A) Coiled-coil probabilities of yMlp (dark gray) and mTpr (light gray) at different positions in their sequence. The region represented as coiled-coil segments is shown as horizontal dots in a straight line below 0.0. (B) Schematic representation of a yMlp or mTpr dimer. Coiled-coil regions were represented as rigid bodies and linked through flexible strings of beads. The unstructured N- and C- terminal regions were represented as flexible strings of beads. (C) Schematic representation of the FG NR anchor Nups: yNup1, yNup2/mNup50, yNup60/mNup153. All structural regions, including amphiphatic helices (AH) at the N terminus, were represented as rigid helices; all non-structural regions, excluding FG repeats, were represented as flexible strings of beads. FG repeats were not included in the model. The number of amino acid (aa) residues for different Nups are indicated in parenthesis.

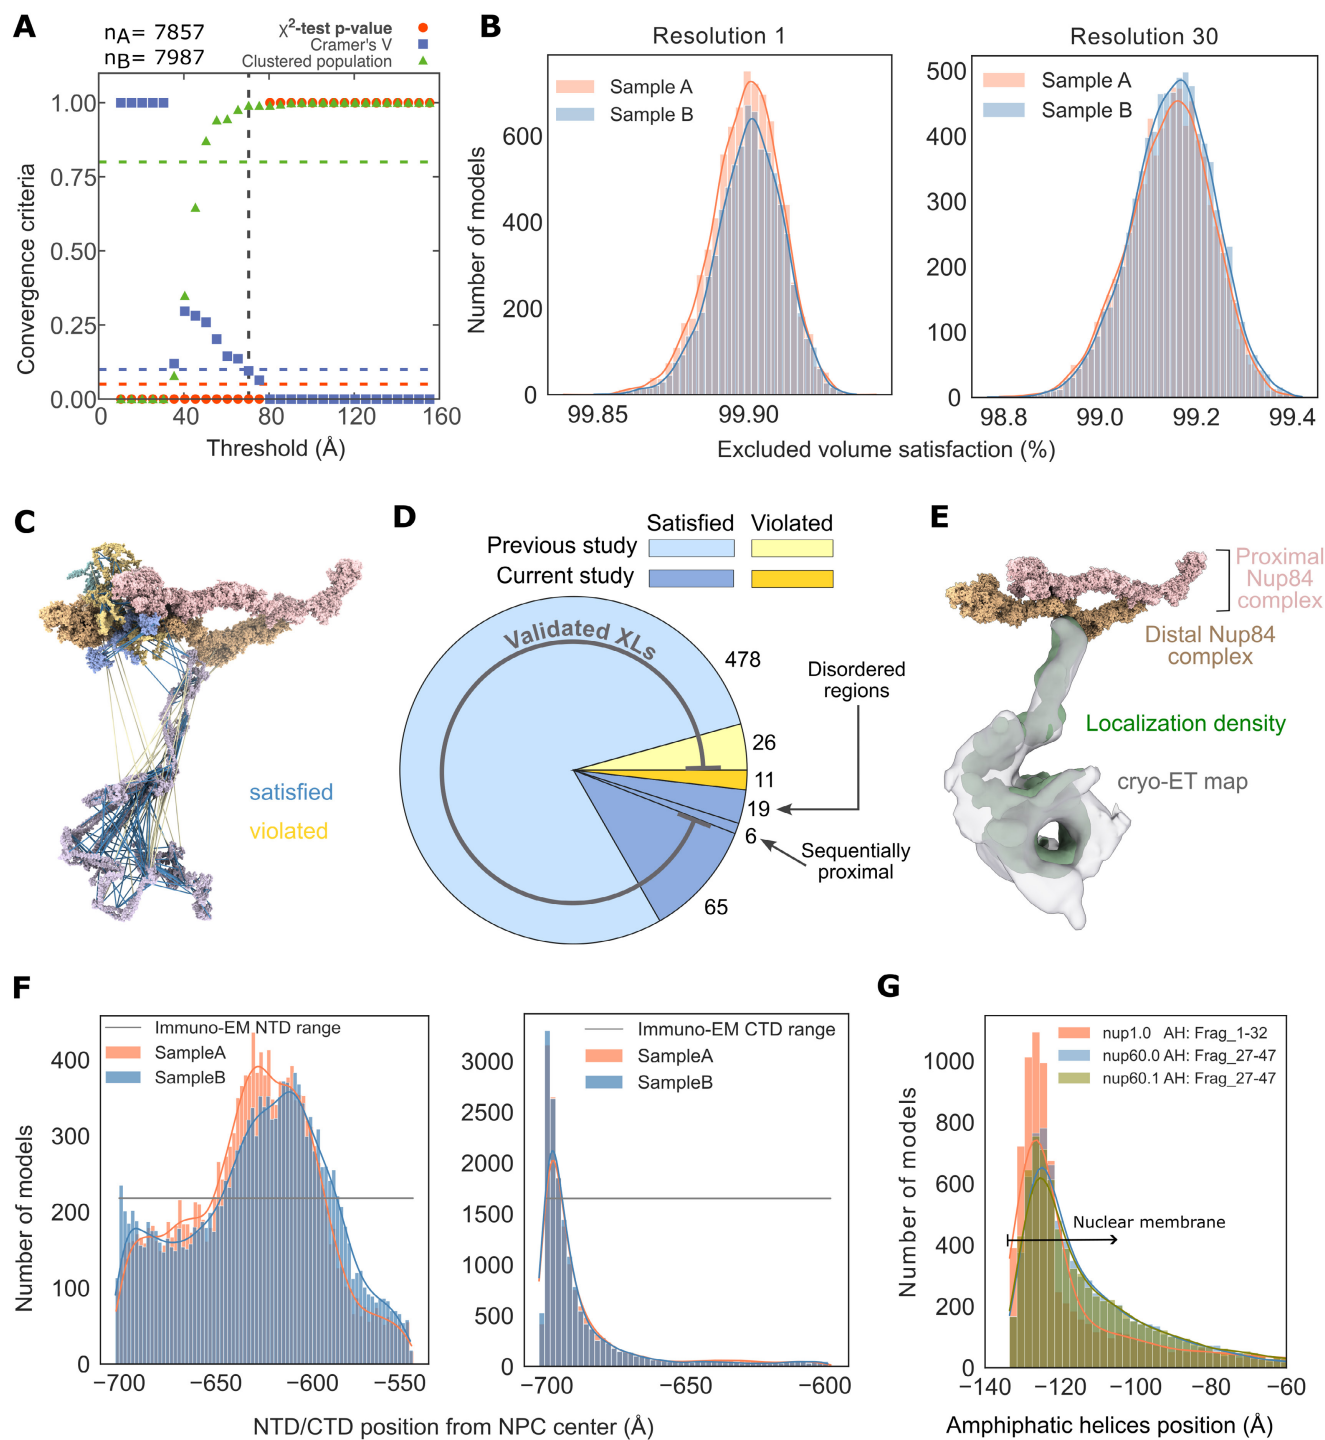

**Fig. S5. Validation of integrative models of the yBasket.** (A) Criteria for determining the sampling precision (y-axis), were evaluated as a function of the RMSD clustering threshold (x-axis) ( $n=15,844$  models). First, the P value is computed using the chi-squared-test (one-sided) for homogeneity of proportions (red dots). Second, an effect size for the chi-squared-test is quantified by the Cramer's V value (blue squares). Third, the population of the structures in sufficiently large clusters is shown as green triangles. The vertical dotted grey line indicates the RMSD clustering threshold at which three conditions are satisfied (Cramer's V (0.095) $<0.1$  (blue horizontal dotted lines), P value (0.0) $<0.05$  and the population of clustered structures (0.99) $>0.8$  (green horizontal dotted lines), thus defining the sampling precision of 70.4 Å. The three solid curves (red, blue, and green) were drawn through the points to help visualize the results. The number of models in two randomly drawn samples, sample A and sample B, from a pool of filtered models ( $n=2,283,627$  models) is denoted by  $n_A$  (7857 models) and  $n_B$  (7987 models). (B) Histogram of excluded volume restraint satisfaction of samples  $n_A$  and  $n_B$  at two different resolutions of 1 and 30 residues per bead. (C) Chemical crosslinks were mapped onto the structure of the yBasket subunit with lines. Satisfied crosslinks where Euclidian Ca–Ca distances below 35 Å in the model ensemble are represented with blue lines, whereas violated crosslinks are with red lines. (D) A pie chart of satisfied (shades of blue) and violated (shades of yellow) crosslinks grouped into previously published (6) (light blue and light yellow) and current study (dark blue and dark yellow) crosslinks. The validated crosslinks (grey arc) account for 94% of the crosslinks; validated crosslinks have MS2 spectra with multiple backbone fragmentations of both peptides and peptides of at least 6 residues. Of the non-validated crosslinks, 11 were violated, 6 were trivially satisfied due to sequence proximity, and 19 were in the disordered/N-terminus/C-terminus regions of the basket distal density of our model. (E) A side view of the yBasket models localization density attached to the distal yNup84 complex spans most of the cryo-ET density map. (F) Satisfaction of experimentally derived range (grey line) of the position of yMlps N- and C-terminus by the model ensemble derived values (coral and light blue). (G) Satisfaction of experimentally derived range (grey line) of the position of amphipathic transmembrane helices of yNup1 and yNup60 by the model ensemble derived values (coral and light blue).



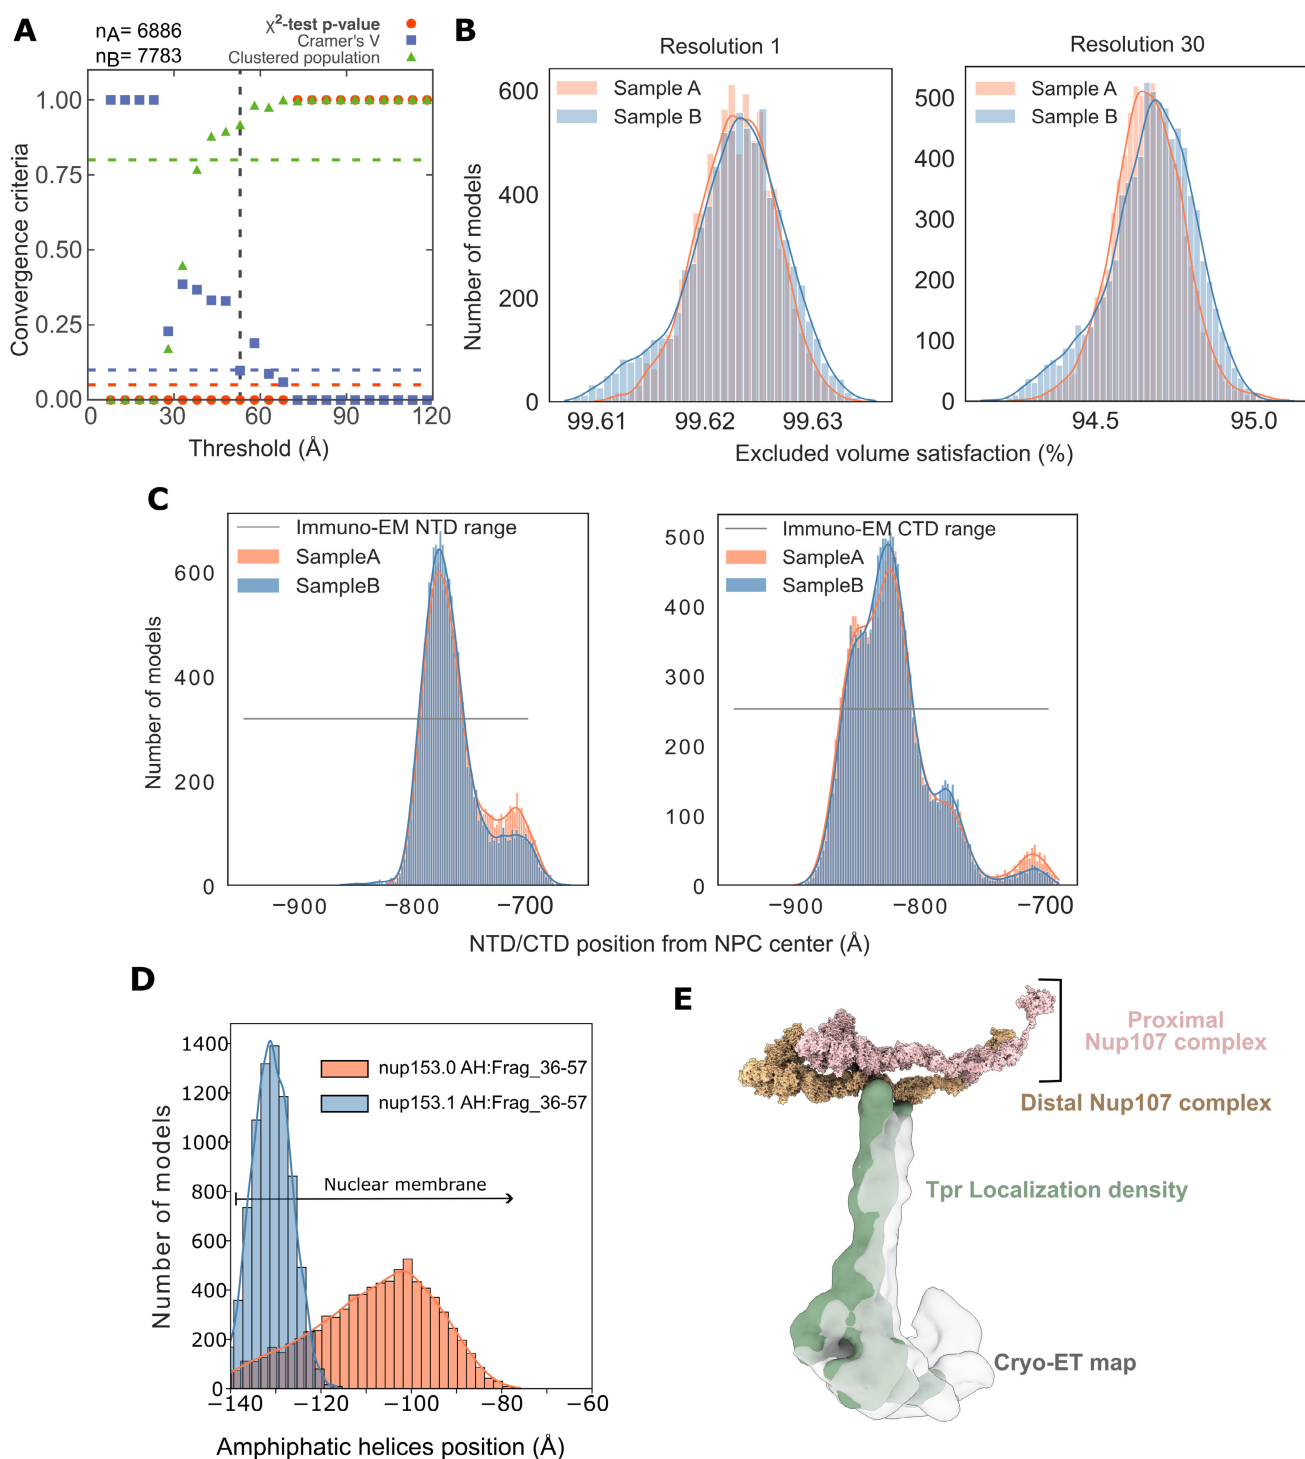

**Fig. S6. Validation of integrative models of the mBasket.** (A) Criteria for determining the sampling precision (y-axis), were evaluated as a function of the RMSD clustering threshold (x-axis) ( $n=14,669$  models). First, the P value is computed using the chi-squared-test (one-sided) for homogeneity of proportions (red dots). Second, an effect size for the chi-squared-test is quantified by the Cramers's V value (blue squares). Third, the population of the structures in sufficiently large clusters is shown as green triangles. The vertical dotted grey line indicates the RMSD clustering threshold at which three conditions are satisfied (Cramer's V ( $0.097$ ) $<0.1$  (blue horizontal dotted lines), P value ( $0.0$ ) $<0.05$  and the population of clustered structures ( $0.92$ ) $>0.8$  (green horizontal dotted lines), thus defining the sampling precision of 52.9 Å. The three solid curves (red, blue, and green) were drawn through the points to help visualize the results. The number of models in two randomly drawn samples from a pool of filtered models ( $n=995,151$  models) is denoted by  $n_A$  (6886 models) and  $n_B$  (7783 models). (B) Histogram of excluded volume restraint satisfaction of samples  $n_A$  and  $n_B$  at two different resolutions of 1 and 30 residues per bead. (C) Satisfaction of experimentally derived range (gray line) of the position of mTpr's N- and C-terminus by the model ensemble derived values (coral and light blue). (D) Satisfaction of the experimentally derived range (gray line) of the position of amphipathic transmembrane helices of mNup153 by the model ensemble derived values (coral and light blue). (E) A side view of the mBasket models localization density attached to the distal mNup107 complex spans most of the cryo-ET density map.
